# Supplementary material
Source: PubMed Central journal article supplement (PMC4403170)
Supplement: pnas.201423456SI.pdf [file pnas.201423456SI.pdf]

# Supporting Information

Jeschke et al. 10.1073/pnas.1423456112

## SI Text

**Chemicals, Antibodies, Plasmids, and Recombinant Proteins.** Chemicals were of research grade and purchased from Sigma Aldrich or Carl Roth, unless stated otherwise. Hexokinase, ATP, creatine phosphate, creatine kinase, and pefabloc were from Roche. Wortmannin (WM) was from EMD Millipore. Pik-93 and mouse anti-PI(4)P IgM (No. Z-P004) were from Echelon Bioscience. Mouse anti-TfR was from Zymed (No. 13–6890). Rabbit anti-Rab5b (No. sc-598), goat anti-cathepsin D (No. sc-6486), and rabbit anti-GST (No. sc-459) were from Santa Cruz Biotechnology. Rabbit anti-PI4KII $\beta$  was from Pierce (No. PA5-15277). Affinity-purified inhibitory rabbit anti-Vps34 (1) and purified inhibitory mouse anti-type II PI4K (clone 4C5G) (2) were as previously published. Fab fragments of 4C5G were prepared using the Mouse IgG1 Fab and F(ab')<sub>2</sub> preparation kit (Pierce). The rat antimurine lysosome-associated membrane protein 1 (LAMP1; clone 1D4B) elevated by J. T. August was obtained from the Developmental Studies Hybridoma Bank under the auspices of the Eunice Kennedy Shriver National Institute of Child Health and Human Development and maintained by the University of Iowa, Department of Biology, Iowa City, Iowa. The following antibodies were kind gifts: rabbit anti-Rab7 (T. Watts, University of Toronto, Toronto, ON, Canada) (3) and rabbit anti-PI4KII $\alpha$  (P. de Camilli, Yale University School of Medicine, New Haven, CT) (4).

Plasmids encoding 2xFYVE-GST [two copies of FYVE (Fab1p, YOTB, Vac1p, EEA1) domain from Hrs (hepatocyte growth factor-regulated tyrosine kinase substrate) in tandem (5)] or hexahistidine- and GST-tagged MTM1 (myotubularin 1) (6) were from W. Wickner (Geisel School of Medicine, Dartmouth College, Hanover, NH). Plasmid DNA encoding GST-fusions of PH domains of Centaurin  $\beta$ 2, TAPP1 (tandem PH domain-containing protein), FAPP1, or PLC $\delta$ 1 (phospholipase C $\delta$ 1) or full-length mouse GRP1 (general receptor for phosphoinositides 1) (7) were from D. Alessi (University of Dundee, Dundee, United Kingdom). Plasmids encoding a GST-fusion of Rab7-interacting lysosomal protein-C33 (RILP-C33) (8) or hexahistidine-fusions of RabGDI (9) or Sac1p (10) were kindly provided by C. Bucci (University of Salento, Lecce, Italy), O. Ullrich (Hamburg University of Applied Sciences, Hamburg, Germany), and C. Barlowe (Geisel School of Medicine, Dartmouth College, Hanover, NH), respectively. Purified SidC P4C [PI(4)P-binding fragment from *Legionella pneumophila* SidC] was as previously published (11).

**Cultivation of Mammalian Cells.** High mannose receptor cell line J774E from P. D. Stahl (Washington University in St. Louis, St. Louis, MO) and RAW 264.7 mouse macrophages from the German Collection of Microorganisms and Cell Cultures (Braunschweig, Germany) were grown in DMEM/FCS at 37 °C in a humid atmosphere of 7% CO<sub>2</sub>.

**Coating of Latex Beads with NeutrAvidin, Fluorescent Labeling of BSA, and Preparation of Ferrofluid.** BSA-rho was prepared as in ref. 12. For preparation of BSA-rho-bio, 5 mg/mL BSA in 0.1 M NaHCO<sub>3</sub> were mixed with 1.2 mg/mL carboxytetramethylrhodamine-NHS-ester and 1.56 mg/mL of biotin-LC-NHS ester (Thermo Scientific), incubated for 2 h at ambient temperature, and dialyzed against PBS for 2 h at ambient temperature. BSA-bio was prepared by mixing 5 mg/mL BSA in 0.1 M NaHCO<sub>3</sub> with 1.56 mg/mL of biotin-LC-NHS ester for 2 h at ambient temperature and dialysis against HB.

Carboxylated 1- $\mu$ m latex beads (Polysciences) were coated with NeutrAvidin (Pierce) as in ref. 13, with modifications. In

brief,  $4.6 \times 10^{10}$  particles/mL were washed twice in Mes (4-morpholineethanesulfonic acid) buffer (50 mM Mes/NaOH, pH 6.8), resuspended in Mes buffer containing 0.3 mg/mL NeutrAvidin, and incubated for 15 min on a rocker at ambient temperature. *N*-(3-Dimethylaminopropyl)-*N'*-ethylcarbodiimide hydrochloride (EDAC) was added (final concentration: 0.2 mg/mL). After 60 min at ambient temperature, another 0.2 mg/mL of EDAC were added and particles were incubated for additional 60 min at ambient temperature. Tris buffer (1.5 M Tris/HCl, pH 8.8) was added (final concentration: 10 mM Tris). Particles were washed three times in PBS (16,100  $\times$  g, 4 °C, 5 min), resuspended in storage buffer (PBS, 10 mg/mL BSA, 1 $\times$  protease inhibitor mixture 0.01% Na<sub>3</sub>), and stored at 4 °C.

**Fluorescent and Paramagnetic Labeling of Endocytic Compartments.** Labeling of early endosomes was achieved by adding DMEM/FCS containing 3.5 mg/mL calcein and 6  $\mu$ L/mL ferrofluid (EMG 508, Ferrotec Europe) for 10 min at 37 °C.

Labeling of late endosomes was achieved by adding DMEM/FCS containing 200  $\mu$ g/mL BSA-rho-bio and 6  $\mu$ L/mL ferrofluid (pulse) for 10 min at 37 °C, washing cells twice in PBS, and adding DMEM/FCS containing 200  $\mu$ g/mL BSA-rho-bio. Cells were incubated for an additional 20 min at 37 °C (chase).

Lysosomes were fluid-phase labeled using BSA-rho-bio or calcein. For labeling with BSA-rho-bio, J774E macrophages were incubated for 16 h at 37 °C in DMEM/FCS containing 100  $\mu$ g/mL BSA-rho-bio. Fluor-containing DMEM/FCS was removed and 6  $\mu$ L/mL ferrofluid in DMEM/FCS was added for 5 min at 37 °C (pulse). Cells were rinsed twice in PBS, fresh DMEM/FCS was added, and cells were incubated for 120 min at 37 °C (chase). Labeling with calcein was for 10 min (37 °C) in DMEM/FCS containing 3.5 mg/mL calcein and 6  $\mu$ L/mL ferrofluid (pulse). Cells were washed twice in PBS and incubated at 37 °C for 120 min in fresh DMEM/FCS (chase).

**Biochemical Analysis of Phagosome and Endosome Maturation.** For immunoblot analysis, different-aged LBPs were harvested from density gradients, adjusted to identical OD<sub>600</sub> and to 4.3% (wt/vol) sucrose, and pelleted (100,000  $\times$  g, 60 min, 4 °C). LBPs were resuspended in SDS-sample buffer [40 mM Tris/HCl (pH 6.8), 4% (vol/vol) glycerol, 0.64% SDS, 0.01% bromophenol blue] and incubated for 5 min at 95 °C before separation and blotting.

Protein contents of purified endocytic compartments were determined using Bio-Rad protein assay. Purified endosomes were adjusted to identical protein concentration, SDS-sample buffer was added, and samples were incubated for 5 min at 95 °C.

To prepare total cell lysates (TCL), cells were washed twice in PBS, resuspended in RIPA [25 mM Tris-HCl (pH 7.6), 150 mM NaCl, 1% Nonidet P-40, 1% sodium deoxycholate, 0.1% SDS], and incubated for 30 min at 4 °C. Samples were centrifuged (16,100  $\times$  g, 4 °C, 30 min). Supernatants (TCL) were adjusted to identical protein content and analyzed by immunoblotting.

Separated phagosome, endosome, or TCL proteins were transferred onto nitrocellulose membranes (Schleicher and Schuell Bioscience) and proteins of interest were detected after incubation in blocking buffer [PBS, 5% (wt/vol) nonfat milk, 0.05% Tween] for 30 min at ambient temperature. Primary antibodies used in this study were diluted in blocking buffer as follows: Mouse anti-TfR (ZYMED, No. 13–6890) 1:200, rabbit anti-Rab5b (Santa Cruz Biotechnology, No. sc-598) 1:250, goat anticyathepsin D (Santa Cruz Biotechnology, No. sc-6486) 1:250, rabbit anti-GST (Santa Cruz Biotechnology, No. sc-459) 1:500, rabbit anti-Rab7

(T. Watts, University of Toronto, Toronto, ON, Canada) 1:500, rabbit anti-PI4KII $\alpha$  (P. de Camilli, Yale University School of Medicine, New Haven, CT) 1:250, and rabbit anti-PI4KII $\beta$  (Pierce), 1:250. Primary antibodies were detected by enhanced chemiluminescence (Pierce) using suitable HRP-coupled secondary antibodies (Dianova) diluted in PBST (PBS, 0.05% Tween, 1:5,000).

**Detection of Lipid Species on Endosomes by Lipid Probes.** Purified endosomes (0.4 mg protein/mL) were incubated under fusion assay conditions in the presence of 2  $\mu$ M GST-tagged lipid probe or a PI(4)P-binding antibody (1:200) for 60 min. Reactions were adjusted to 1 mL HB/1 mM DTT, set on a magnet, and compartments were washed twice in 1 mL HB/1 mM DTT at 4  $^{\circ}$ C. For immunoblot analysis, endosomes were harvested, adjusted to equal protein content, and assayed for bound lipid-binding probes by immunoblotting using a rabbit anti-GST antibody (Santa Cruz Biotechnology, No. sc-459, 1:500 in blocking buffer) and a HRP-coupled secondary antibody (goat anti-rabbit, 1:5,000 in PBST). For fluorescence microscopy analysis, lysosomes were harvested, spun onto glass coverslips (1,800  $\times$  g, 4  $^{\circ}$ C, 15 min), and fixed in HB containing 4% (wt/vol) FA for 60 min. Visualization of lysosome-associated lipid-binding probes was performed as described for LBPs (*Materials and Methods*).

**Analysis of Phagosome and Lysosome Lipids by RP-HPLC-MS.** Purified lysosomes (230  $\mu$ g protein) were prepared as described above and incubated under fusion assay conditions in a reaction of 10 times the standard volume for 60 min at 37  $^{\circ}$ C. One milliliter of HB was added and lysosomes were pelleted (100,000  $\times$  g, 60 min, 4  $^{\circ}$ C). LBPs (18 OD<sub>600</sub>) were prepared from J774E cells and incubated in a fusion reaction of 200 times the standard volume for 60 min at 37  $^{\circ}$ C. Reactions were adjusted to 4.3% (wt/vol) sucrose and LBPs were collected by centrifugation (100,000  $\times$  g, 60 min, 4  $^{\circ}$ C). LBP and lysosome lipids were extracted as in ref. 14. In brief, LBP or lysosome suspensions were mixed with 500  $\mu$ L of chloroform/methanol (1:2) and incubated on ice for 10 min. Next, 300  $\mu$ L of 20% (vol/vol) HCl were added and the phases were separated by centrifugation. The lower organic phase was collected and solvent was removed in vacuum. To deacylate lipids, methylamine in water/methanol/1-butanol (43:46:11) was added and samples were incubated for 50 min at 53  $^{\circ}$ C (15). Samples were set on ice, 25  $\mu$ L cold n-propanol were added, and samples were dried in vacuum. Before RP-HPLC-MS analysis, dried lipids were dissolved in 50  $\mu$ L of solvent A [water containing 5 mM N,N-Dimethylhexylamine (DMHA) and 4 mM glacial acetic acid].

RP-HPLC-MS analysis of monophosphorylated PIPs was performed essentially as in ref. 16. An Agilent 1100 HPLC system

(Agilent) was used for the separation of PIPs prepared from purified lysosomes on a 250-mm Synergi 4u Hydro-RP 80A column with a particle size of 3  $\mu$ m (Phenomenex) and 0.5-mm inner diameter using 10- $\mu$ L injection volumes. Lipid extracts from purified LBPs were separated using two 150 mm Biobasic C18 columns in line (Thermo Fisher). Both column setups were suitable to separate PI(3)P and PI(4)P. Solvents, gradient profile, and flow rates were similar for both column set-ups and are summarized in Table S1. Full-scan MS data were acquired during the first 80 min of the HPLC separation in the negative ion mode on a Bruker Apex Qe FT-ICR mass spectrometer (Bruker) equipped with a 7 Tesla actively shielded magnet and an Apollo Dual ESI/MALDI ion source. The instrumental parameters were as follows: source temperature, 200  $^{\circ}$ C; datapoints sampling rate, 512k; accumulation time for each scan, 0.3 s. Data acquisition and analysis was performed using the HyStar 3.2 software (Bruker Daltonics). RP-HPLC-MS data were processed using Bruker's Data Analysis 3.4 software. EIC were obtained for the deacylated PIP species at 413.02555 *m/z*.

#### Analysis of Colocalization of LBPs with Lysosome Contents in Intact Cells.

J774E macrophages were incubated with 50  $\mu$ g/mL BSA-rho in DMEM/FCS for 16 h. Cells were washed twice in PBS and fresh DMEM/FCS was added for additional 120 min at 37  $^{\circ}$ C to deliver BSA-rho to lysosomes. Cells were washed once in PBS, incubated for 10 min in a suspension of 1  $\mu$ m NeutrAvidin-coated latex beads in DMEM (6  $\times$  10<sup>8</sup> particles/mL), washed three times in PBS, and fresh DMEM/FCS was added for 20 min at 37  $^{\circ}$ C. Cells were washed once in cold PBS, DMEM containing 100 nM WM (or DMSO) was added, and cells were incubated for 30 min at 15  $^{\circ}$ C. Then, cells were either set on ice or incubated at 37  $^{\circ}$ C for additional 60 min in fresh DMEM containing either 100 nM WM or DMSO. Eventually, cells were harvested and postnuclear supernatants (PNSs) were prepared. PNSs were adjusted to identical protein concentration and 2x $\text{FYVE-GST}$  (final concentration: 4  $\mu$ M) was added. After 15 min at 4  $^{\circ}$ C, PNSs were adjusted to 35% (wt/vol) sucrose by addition of HB/62%, overlaid with 1 mL of HB/25% and 200  $\mu$ L of HB. The resulting density gradients were centrifuged (1,600  $\times$  g, 4  $^{\circ}$ C, 30 min) and LBPs were harvested from the HB/25%/HB interface, adjusted to 500  $\mu$ L HB and 2 mg/mL BSA, and spun and fixed onto glass coverslips using HB/4% FA for 16 h at 4  $^{\circ}$ C. Samples were quenched by addition of HB/50 mM NH<sub>4</sub>Cl and immunostained for phagosome-associated 2x $\text{FYVE-GST}$  as described above. The proportions of LBPs colocalizing with the lysosomal tracer or 2x $\text{FYVE-GST}$  were determined using Zeiss Axio Observer.Z1 epifluorescence microscope and image analysis by ImageJ.

- Siddhanta U, McIlroy J, Shah A, Zhang Y, Backer JM (1998) Distinct roles for the p110 $\alpha$  and hVPS34 phosphatidylinositol 3'-kinases in vesicular trafficking, regulation of the actin cytoskeleton, and mitogenesis. *J Cell Biol* 143(6):1647–1659.
- Endemann GC, Graziani A, Cantley LC (1991) A monoclonal antibody distinguishes two types of phosphatidylinositol 4-kinase. *Biochem J* 273(Pt 1):63–66.
- Bertram EM, Hawley RG, Watts TH (2002) Overexpression of rab7 enhances the kinetics of antigen processing and presentation with MHC class II molecules in B cells. *Int Immunol* 14(3):309–318.
- Guo J, et al. (2003) Phosphatidylinositol 4-kinase type II $\alpha$  is responsible for the phosphatidylinositol 4-kinase activity associated with synaptic vesicles. *Proc Natl Acad Sci USA* 100(7):3995–4000.
- Gillooly DJ, et al. (2000) Localization of phosphatidylinositol 3-phosphate in yeast and mammalian cells. *EMBO J* 19(17):4577–4588.
- Taylor GS, Maehama T, Dixon JE (2000) Myotubularin, a protein tyrosine phosphatase mutated in myotubular myopathy, dephosphorylates the lipid second messenger, phosphatidylinositol 3-phosphate. *Proc Natl Acad Sci USA* 97(16):8910–8915.
- Dowler S, et al. (2000) Identification of pleckstrin-homology-domain-containing proteins with novel phosphoinositide-binding specificities. *Biochem J* 351(Pt 1):19–31.
- Cantalupo G, Alifano P, Roberti V, Bruni CB, Bucci C (2001) Rab-interacting lysosomal protein (RILP): The Rab7 effector required for transport to lysosomes. *EMBO J* 20(4):683–693.
- Ullrich O, Horiuchi H, Alexandrov K, Zerial M (1995) Use of Rab-GDP dissociation inhibitor for solubilization and delivery of Rab proteins to biological membranes in streptolysin O-permeabilized cells. *Methods Enzymol* 257:243–253.
- Maehama T, Dixon JE (2000) PTEN tumor suppressor: Functions as a lipid phosphatase. *Tanpakushitsu Kakusan Koso* 45(14):2405–2414. Japanese.
- Ragaz C, et al. (2008) The *Legionella pneumophila* phosphatidylinositol-4 phosphate-binding type IV substrate SidC recruits endoplasmic reticulum vesicles to a replication-permissive vacuole. *Cell Microbiol* 10(12):2416–2433.
- Becken U, Jeschke A, Veltman K, Haas A (2010) Cell-free fusion of bacteria-containing phagosomes with endocytic compartments. *Proc Natl Acad Sci USA* 107(48):20726–20731.
- Hoffmann E, et al. (2010) Initial receptor-ligand interactions modulate gene expression and phagosomal properties during both early and late stages of phagocytosis. *Eur J Cell Biol* 89(9):693–704.
- Bligh EG, Dyer WJ (1959) A rapid method of total lipid extraction and purification. *Can J Biochem Physiol* 37(8):911–917.
- Clarke NG, Dawson RM (1981) Alkaline O leads to N-transacylation. A new method for the quantitative deacylation of phospholipids. *Biochem J* 195(1):301–306.
- Kiefer S, et al. (2010) Separation and detection of all phosphoinositide isomers by ESI-MS. *J Pharm Biomed Anal* 53(3):552–558.





**Table S1. Gradient used for the separation of lipids by RP-HPLC-MS**

| Time (min) | Solvent A (%) | Solvent B (%) |
|------------|---------------|---------------|
| 0          | 85            | 15            |
| 2          | 85            | 15            |
| 60         | 65            | 35            |
| 61         | 0             | 100           |
| 76         | 0             | 100           |
| 79         | 85            | 15            |
| 120        | 85            | 15            |

Flow rates: 10  $\mu$ L/min using (Synergi column), 5  $\mu$ L/min (Two Biobasic C18 columns in line). Solvents: A, water containing 5 mM *N,N*-Dimethylhexylamine (DMHA) and 4 mM glacial acetic acid; B, methanol containing 5 mM DMHA and 4 mM glacial acetic acid (50:49:1).
